# Supplementary material for: Out-of-Sample Prediction in Multidimensional P-Spline Models
Source: MDPI journal article supplement (doi:10.3390/math9151761), 2021-07-26
Supplement: s1 [file s1]

# Supplementary Materials: Out-of-sample prediction in multidimensional P-spline models

Alba Carballo <sup>1,†</sup>, María Durbán <sup>1,†</sup>  and Dae-Jin Lee <sup>2,†,\*</sup> 

## Proof of Theorem 1

Differentiating Eq. (12) in the main text with respect to  $\theta_+$  leads to

$$\frac{\partial S}{\partial \theta_+} = -2B'_+ \tilde{R}_+^{-1} (y_+ - B_+ \theta_+) + 2(\lambda_z P_{++}^z + \lambda_x P_{++}^{x+}) = 0$$

i.e., the penalized least squares solution is given by:

$$\hat{\theta}_+ = (B'_+ \tilde{R}_+^{-1} B_+ + \lambda_z P_{++}^z + \lambda_x P_{++}^{x+})^{-1} B'_+ \tilde{R}_+^{-1} y_+. \quad (1)$$

Let us define  $C = (B'_+ \tilde{R}_+^{-1} B_+ + \lambda_z P_{++}^z + \lambda_x P_{++}^{x+})$  and  $C^{-1} = \begin{bmatrix} C^{11} & C^{12} \\ C^{21} & C^{22} \end{bmatrix}$ , with this notation and since  $\tilde{R}_+^{-1} = \tilde{R}_{x_+}^{-1} \otimes \tilde{R}_z^{-1} = \text{blockdiag}(I, O)$ , with  $I$  an identity matrix of dimension  $n_x n_z \times n_x n_z$  and  $O$  a null matrix of dimension  $n_{x_p} n_z \times n_{x_p} n_z$ , equation (1) can be rewritten as

$$\theta_+ = C^{-1} B'_+ \tilde{R}_+^{-1} y_+ = \begin{bmatrix} C^{11} B'_+ y \\ C^{21} B'_+ y \end{bmatrix}. \quad (2)$$

If  $C = \begin{bmatrix} C_{11} & C_{12} \\ C_{21} & C_{22} \end{bmatrix}$ , by Theorem 8.5.11 given in [1] we have that:

$$C^{-1} = \begin{bmatrix} K^{-1} & -K^{-1} C_{12} C_{22}^{-1} \\ -C_{22}^{-1} C_{21} K^{-1} & C_{22}^{-1} + C_{22}^{-1} C_{21} K^{-1} C_{12} C_{22}^{-1} \end{bmatrix},$$

with  $K = C_{11} - C_{12} C_{22}^{-1} C_{21}$ . Therefore:

$$C^{11} = K^{-1} = \left( B'_+ B + \lambda_x P_{++}^{x+} + \lambda_z P_{++}^z - \lambda_x^2 P_{++}^{x+} (\lambda_x P_{++}^{x+} + \lambda_z P_{++}^z)^{-1} P_{++}^{x+} \right)^{-1}$$

and

$$\begin{aligned} C^{21} &= -C_{22}^{-1} C_{21} K^{-1} \\ &= -(\lambda_x P_{++}^{x+} + \lambda_z P_{++}^z)^{-1} \lambda_x P_{++}^{x+} C^{11} \end{aligned}$$

and by equation (2) the coefficients for the fit and for the prediction are given by equations (18) and (19) in the main text, respectively, as we wanted to show.

## Proof Colloraly 1

Notice that if  $P_{++}^z = O$ , by Eq. (18), the coefficients that give the fit are:

$$\hat{\theta}_{+1,\dots,c} = (B'_+ B + \lambda_x (D'_x D_x \otimes I_{c_z}) + \lambda_z (I_{c_x} \otimes D'_z D_z))^{-1} B'_+ y,$$

i.e., the same as the coefficients we obtain only fitting the data without a prediction. Let us see which are the coefficients that determine the forecast when the penalty orders are two or three.

- Differences of order 2.

Suppose a difference matrix with second order penalty  $D_{x_+}$  of dimensions  $(c_{x_+} - 2) \times c_{x_+}$ :

$$D_{x_+} = \begin{bmatrix} D & O \\ D_{x(1)} & D_{x(2)} \end{bmatrix} = \begin{bmatrix} 1 & -2 & 1 & 0 & 0 & 0 & 0 & \cdots \\ 0 & 1 & -2 & 1 & 0 & 0 & 0 & \cdots \\ 0 & 0 & 1 & -2 & 1 & 0 & 0 & \cdots \\ \vdots & \vdots \\ 0 & 0 & 0 & 0 & 0 & 1 & -2 & 1 \end{bmatrix},$$

where  $D_{x(2)}$ :

$$D_{x(2)} = \begin{bmatrix} 1 & 0 & 0 & 0 & 0 & \cdots & 0 \\ -2 & 1 & 0 & 0 & 0 & \cdots & 0 \\ 1 & 2 & 1 & 0 & 0 & \cdots & 0 \\ 0 & 1 & -2 & 1 & 0 & \cdots & 0 \\ 0 & 0 & 1 & -2 & 1 & \cdots & 0 \\ \vdots & \vdots & \vdots & \vdots & \vdots & \vdots & \vdots \\ 0 & 0 & 0 & 0 & 1 & -2 & 1 \end{bmatrix},$$

of dimension  $c_{x_p} \times c_{x_p}$ , where  $c_{x_p}$  is the number of columns of  $B_{x(2)}$ . Therefore,  $(D_{x(2)} \otimes I_{c_z})^{-1}$  has the form

$$\begin{bmatrix} 1 & & & & & & & \\ & \ddots & & & & & & \\ & & 1 & & & & & \\ 2 & & & 1 & & & & \\ & \ddots & & & \ddots & & & \\ & & 2 & & 1 & & & \\ 3 & & & 2 & & 1 & & \\ & \ddots & & & \ddots & & \ddots & \\ & & 3 & & 2 & & 1 & \\ 4 & & & 3 & & 2 & & 1 \\ & \ddots & & & \ddots & & \ddots & \\ & & 4 & & 3 & & 2 & 1 \\ & & & \ddots & & \ddots & & \ddots \end{bmatrix}$$

of dimension  $(c_{x_p} \cdot c_z) \times (c_{x_p} \cdot c_z)$ , each block has dimension  $c_z \times c_z$ . Moreover,

$$D_{x(1)} \otimes I_{c_z} = \begin{bmatrix} 0 & 0 & & 1 & -2 & & \\ & \ddots & & \ddots & & \ddots & \\ 0 & 0 & 0 & 0 & & 1 & -2 \\ & \ddots & & \ddots & & \ddots & \\ 0 & 0 & 0 & 0 & & 0 & 1 \\ & \ddots & & \ddots & & \ddots & \\ & & 0 & 0 & & 0 & 0 \end{bmatrix},$$

i.e., is a matrix of dimension  $(c_{x_p} \cdot c_z) \times (c_x \cdot c_z)$  with just three blocks of dimension  $c_z \times c_z$  that are not blocks of zeros. Therefore,

$$(D_{x(2)} \otimes I_{c_z})^{-1}(D_{x(1)} \otimes I_{c_z}) = \begin{bmatrix} 0 & 0 & 1 & -2 & & & \\ & \ddots & & & \ddots & & \\ 0 & 0 & 0 & 0 & 2 & 1 & -3 & -2 \\ & \ddots & & & \ddots & & & \\ 0 & 0 & 0 & 0 & 3 & 2 & -4 & -3 \\ & \ddots & & & \ddots & & & \\ 0 & 0 & 0 & 0 & 4 & 3 & -5 & -4 \\ & \ddots & & & \ddots & & & \\ 0 & 0 & 0 & 0 & 4 & 4 & -5 & -5 \\ & \ddots & & & \ddots & & & \\ & & \vdots & & \vdots & & \vdots & \end{bmatrix},$$

with dimension  $(c_{x_p} \cdot c_z) \times (c_x \cdot c_z)$ . Hence, considering the matrix of coefficients that give the fit,  $\hat{\Theta}$ , and the matrix of coefficients that give the forecast,  $\hat{\Theta}_p$ , each row  $j = 1, \dots, c_z$ , of the additional matrix of coefficients is a linear combination of two old coefficients of that row:

$$\hat{\Theta}_{j \cdot} = \hat{\theta}_{j \cdot c_x} \begin{bmatrix} 1 \\ 1 \\ 1 \\ \vdots \end{bmatrix} + (\hat{\theta}_{j \cdot c_x} - \hat{\theta}_{j \cdot c_x - 1}) \begin{bmatrix} 1 \\ 2 \\ 3 \\ \vdots \end{bmatrix}.$$

- Differences of order 3.

Suppose a difference matrix with third order penalty,  $D_{x+}$  of dimensions  $(c_{x+} - 3) \times c_{x+}$ :

$$D_{x+} = \begin{bmatrix} -1 & 3 & -3 & 1 & 0 & 0 & \cdots & 0 & 0 & 0 & 0 \\ 0 & -1 & 3 & -3 & 1 & 0 & \cdots & 0 & 0 & 0 & 0 \\ 0 & 0 & -1 & 3 & -3 & 1 & \cdots & 0 & 0 & 0 & 0 \\ \vdots & \vdots & \vdots & \vdots & \vdots & \vdots & \cdots & \vdots & \vdots & \vdots & \vdots \\ 0 & 0 & 0 & 0 & 0 & 0 & \cdots & -1 & 3 & -3 & 1 \end{bmatrix}.$$

In this case,  $D_{x(2)}$  is:

$$D_{x(2)} = \begin{bmatrix} 1 & 0 & 0 & 0 & \cdots & 0 & 0 & 0 & 0 \\ -3 & 1 & 0 & 0 & \cdots & 0 & 0 & 0 & 0 \\ 3 & -3 & 1 & 0 & \cdots & 0 & 0 & 0 & 0 \\ \vdots & \vdots & \vdots & \vdots & \cdots & \vdots & \vdots & \vdots & \vdots \\ 0 & 0 & 0 & 0 & \cdots & -1 & 3 & -3 & 1 \end{bmatrix}.$$

$(D_{x(2)} \otimes I_{c_z})^{-1}$  and  $D_{x(1)} \otimes I_{c_z}$  are:

$$\begin{aligned}
 (D_{x(2)} \otimes I_{c_z})^{-1} &= \begin{bmatrix} 1 & & & & & & & & \\ & \ddots & & & & & & & \\ & & 1 & & & & & & \\ 3 & & & 1 & & & & & \\ & \ddots & & & \ddots & & & & \\ & & 3 & & 1 & & & & \\ 6 & & & 3 & & 1 & & & \\ & \ddots & & & \ddots & & \ddots & & \\ & & 6 & & 3 & & 1 & & \\ 10 & & & 6 & & 3 & & 1 & \\ & \ddots & & & \ddots & & \ddots & & \ddots \\ & & 10 & & 6 & & 3 & & 1 \\ & \vdots & & \vdots & & \vdots & & \vdots & \ddots \end{bmatrix}, \\
 D_{x(1)} \otimes I_{c_z} &= \begin{bmatrix} 0 & & & -1 & & 3 & & -3 & \\ & \ddots & & & \ddots & & \ddots & & \ddots \\ & & 0 & & & -1 & & 3 & -3 \\ 0 & & & 0 & & -1 & & 3 & \\ & \ddots & & & \ddots & & \ddots & & \ddots \\ & & 0 & & & 0 & & -1 & 3 \\ 0 & & & 0 & & 0 & & -1 & \\ & \ddots & & & \ddots & & \ddots & & \ddots \\ & & 0 & & & 0 & & 0 & -1 \\ & \vdots & & \vdots & & \vdots & & \vdots & \ddots \end{bmatrix}.
 \end{aligned}$$

Then,

$$(D_{x(2)} \otimes I_{c_z})^{-1} (D_{x(1)} \otimes I_{c_z}) = \begin{bmatrix} 0 & & & -1 & & 3 & & -3 & \\ & \ddots & & & \ddots & & \ddots & & \ddots \\ & & 0 & & & -1 & & 3 & -3 \\ 0 & & & -3 & & 8 & & -6 & \\ & \ddots & & & \ddots & & \ddots & & \ddots \\ & & 0 & & & -3 & & 8 & -6 \\ 0 & & & -6 & & 15 & & -10 & \\ & \ddots & & & \ddots & & \ddots & & \ddots \\ & & 0 & & & -6 & & 15 & -10 \\ 0 & & & -10 & & 24 & & -15 & \\ & \ddots & & & \ddots & & \ddots & & \ddots \\ & & 0 & & & -10 & & 24 & -15 \\ & \vdots & & \vdots & & \vdots & & \vdots & \ddots \end{bmatrix}.$$

Therefore, each row,  $j = 1, \dots, c_z$ , of the additional matrix of coefficients is a linear combination of three old coefficients of that row:

$$\hat{\Theta}_{p_j} = \hat{\theta}_{j \ c_x} \begin{bmatrix} 1 \\ 1 \\ 1 \\ 1 \\ 1 \\ 1 \\ \vdots \end{bmatrix} + \frac{3\hat{\theta}_{j \ c_x} - 4\hat{\theta}_{j \ c_x-1} + \hat{\theta}_{j \ c_x-2}}{2} \begin{bmatrix} 1 \\ 2 \\ 3 \\ 4 \\ 5 \\ 6 \\ \vdots \end{bmatrix} + \frac{\hat{\theta}_{j \ c_x} - 2\hat{\theta}_{j \ c_x-1} + \hat{\theta}_{j \ c_x-2}}{2} \begin{bmatrix} 1 \\ 2 \\ 3 \\ 4 \\ 5 \\ 6 \\ \vdots \end{bmatrix}^2.$$

### Proof of Theorem 2

Given the extended transformation matrix for the random part  $\Omega_{+r}$  and the extended penalty matrix  $P_+$  defined in the main text in Eq. (45) and (43), respectively,  $F_+^*$  is:

$$F_+^* = \Omega_{+r}^{*'} P_+ \Omega_{+r}^* = \begin{bmatrix} 0 & \mathbf{u}_{z+r}^{*'} & \dots \\ \vdots & \mathbf{u}_{x+r}^{*'} & \\ & \mathbf{u}_{x+f}^{*(2)'} \otimes \mathbf{u}_{z+r}^{*'} & \\ & \mathbf{u}_{x+r}^{*'} \otimes \mathbf{u}_{z+f}^{*(2)'} & \\ & \mathbf{u}_{x+r}^{*'} \otimes \mathbf{u}_{z+r}^{*'} & \end{bmatrix} \begin{bmatrix} 0 & \dots \\ \vdots & \lambda_z D'_{z+} D_{z+} \\ & \lambda_x D'_{x+} D_{x+} \\ & \lambda_3 D'_{x+} D_{x+} \otimes I_{c_{z+}} + \lambda_4 I_{c_{x+}} \otimes D'_{z+} D_{z+} \end{bmatrix}$$

$$= \begin{bmatrix} 0 & \dots \\ \mathbf{u}_{zr}^* & \\ \vdots & \mathbf{u}_{x+r}^* \\ & \mathbf{u}_{x+f}^{*(2)} \otimes \mathbf{u}_{z+r}^* \mid \mathbf{u}_{x+r}^* \otimes \mathbf{u}_{z+f}^{*(2)} \mid \mathbf{u}_{x+r}^* \otimes \mathbf{u}_{z+r}^* \\ & \lambda_z \mathbf{u}_{z+r}^{*'} D'_{z+} D_{z+} \mathbf{u}_{z+r}^* \\ & \lambda_x \mathbf{u}_{x+r}^{*'} D'_{x+} D_{x+} \mathbf{u}_{x+r}^* \\ & \mathbf{F}_+^{(1,2)} \end{bmatrix},$$

where  $\mathbf{F}_+^{(1,2)} = \begin{bmatrix} \mathbf{F}_{+11}^{(1,2)} & \mathbf{O} & \mathbf{F}_{+13}^{(1,2)} \\ \mathbf{O} & \mathbf{F}_{+22}^{(1,2)} & \mathbf{O} \\ \mathbf{F}_{+13}^{(1,2)'} & \mathbf{O} & \mathbf{F}_{+33}^{(1,2)} \end{bmatrix}$ , with

$$\begin{aligned} \mathbf{F}_{+11}^{(1,2)} &= \tau_x \mathbf{u}_{x+f}^{*(2)'} D'_{x+} D_{x+} \mathbf{u}_{x+f}^{*(2)} \otimes \mathbf{u}_{zr}^{*'} \mathbf{u}_{z+r}^* + \tau_z \mathbf{u}_{x+f}^{*(2)'} \mathbf{u}_{x+f}^{*(2)} \otimes \mathbf{u}_{z+r}^{*'} D'_{z+} D_{z+} \mathbf{u}_{z+r}^* \\ \mathbf{F}_{+13}^{(1,2)} &= \tau_z \mathbf{u}_{x+f}^{*(2)'} \mathbf{u}_{x+r}^* \otimes \mathbf{u}_{z+r}^{*'} D'_{z+} D_{z+} \mathbf{u}_{z+r}^* + \tau_x \mathbf{u}_{x+f}^{*(2)'} D'_{x+} D_{x+} \mathbf{u}_{x+r}^* \otimes \mathbf{u}_{z+r}^{*'} \mathbf{u}_{z+r}^* \\ \mathbf{F}_{+22}^{(1,2)} &= \tau_x \mathbf{u}_{x+r}^{*'} D'_{x+} D_{x+} \mathbf{u}_{x+r}^* \otimes \mathbf{u}_{z+f}^{*(2)'} \mathbf{u}_{z+f}^{*(2)} + \tau_z \mathbf{u}_{x+r}^{*'} \mathbf{u}_{x+r}^* \otimes \mathbf{u}_{z+f}^{*(2)'} D'_{z+} D_{z+} \mathbf{u}_{z+f}^* \\ \mathbf{F}_{+23}^{(1,2)} &= \tau_x \mathbf{u}_{x+r}^{*'} D'_{x+} D_{x+} \mathbf{u}_{x+r}^* \otimes \mathbf{u}_{z+f}^{*(2)'} \mathbf{u}_{z+r}^* + \tau_z \mathbf{u}_{x+r}^{*'} \mathbf{u}_{x+r}^* \otimes \mathbf{u}_{z+f}^{*(2)'} D'_{z+} D_{z+} \mathbf{u}_{z+r}^* \\ \mathbf{F}_{+33}^{(1,2)} &= \tau_z \mathbf{u}_{x+r}^{*'} \mathbf{u}_{x+r}^* \otimes \mathbf{u}_{z+r}^{*'} D'_{z+} D_{z+} \mathbf{u}_{z+r}^* + \tau_x \mathbf{u}_{x+r}^{*'} D'_{x+} D_{x+} \mathbf{u}_{x+r}^* \otimes \mathbf{u}_{z+r}^{*'} \mathbf{u}_{z+r}^* \end{aligned}$$

using  $\mathbf{u}_{if}^{*(2)'} D'_i = \mathbf{O}$  for  $i = z_+, x_+$ , we obtain the extended mixed model penalty  $F_+^*$  in Eq. (49) in the main text.

**Simulation results for Scenario 1**

- $n_{z_p} = 0, n_{x_p} = 10$

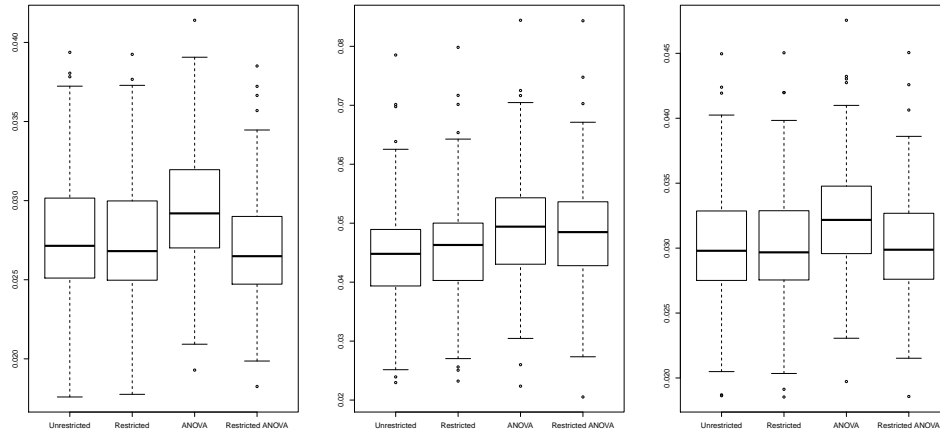

**Figure S1.** MAE in the fit (left panel), in the forecast (middle panel) and in total (right panel) of smooth models in scenario 1 and  $n_{z_p} = 0$  and  $n_{x_p} = 10$ .

- $n_{z_p} = 0, n_{x_p} = 15$

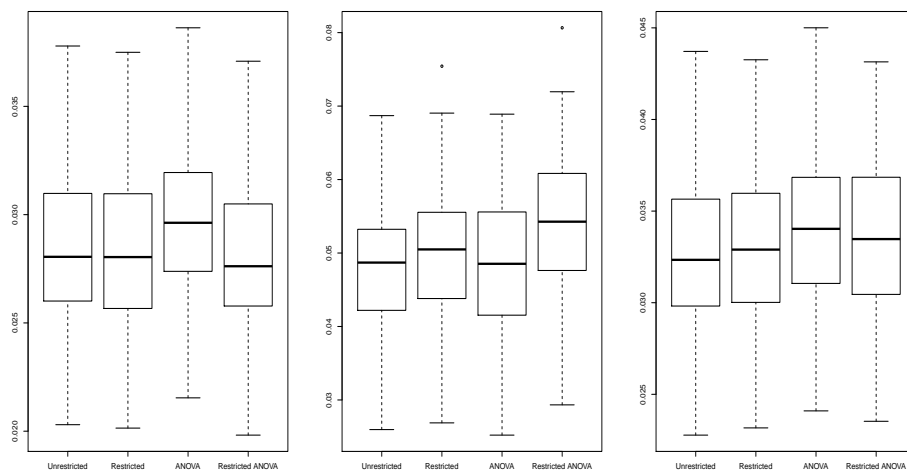

**Figure S2.** MAE in the fit (left panel), in the forecast (middle panel) and in total (right panel) of smooth models in scenario 1 and  $n_{z_p} = 0$  and  $n_{x_p} = 15$ .

- $n_{z_p} = 0, n_{x_p} = 20$

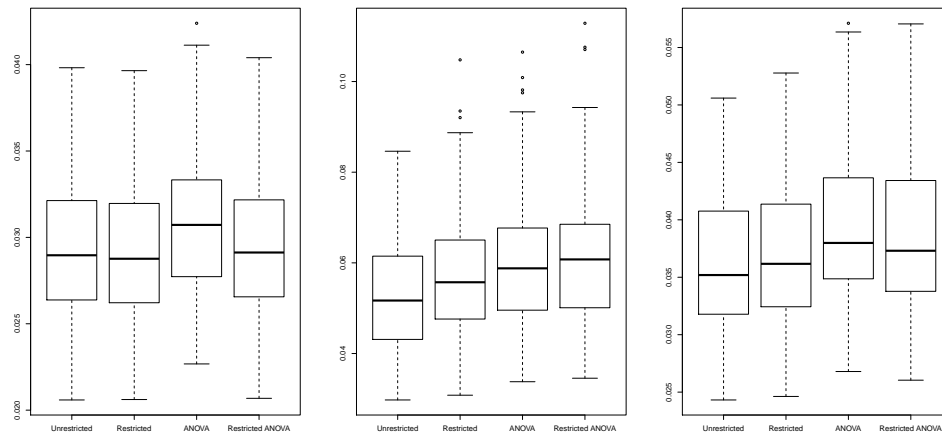

**Figure S3.** MAE in the fit (left panel), in the forecast (middle panel) and in total (right panel) of smooth models in scenario 1 and  $n_{z_p} = 0$  and  $n_{x_p} = 20$ .

- $n_{z_p} = 10, n_{x_p} = 5$

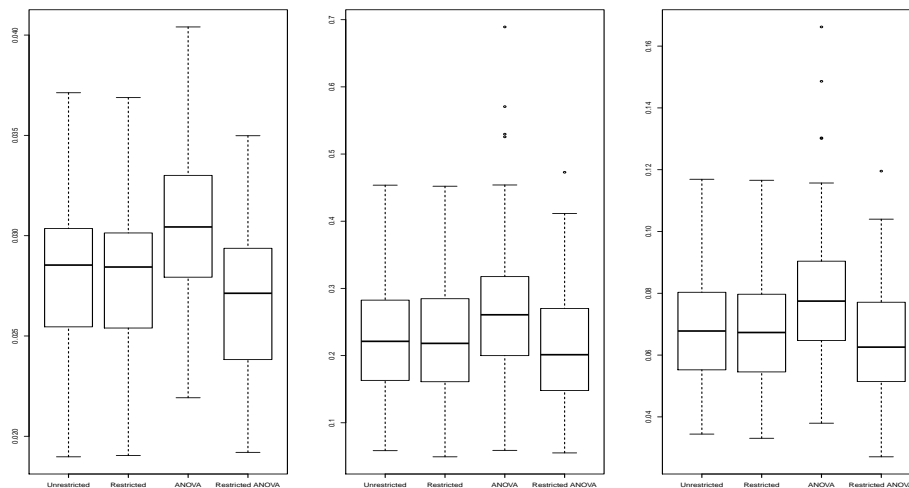

**Figure S4.** MAE in the fit (left panel), in the forecast (middle panel) and in total (right panel) of smooth models in [scenario 1](#) and  $n_{z_p} = 10, n_{x_p} = 5$ .

- $n_{z_p} = n_{x_p} = 10$

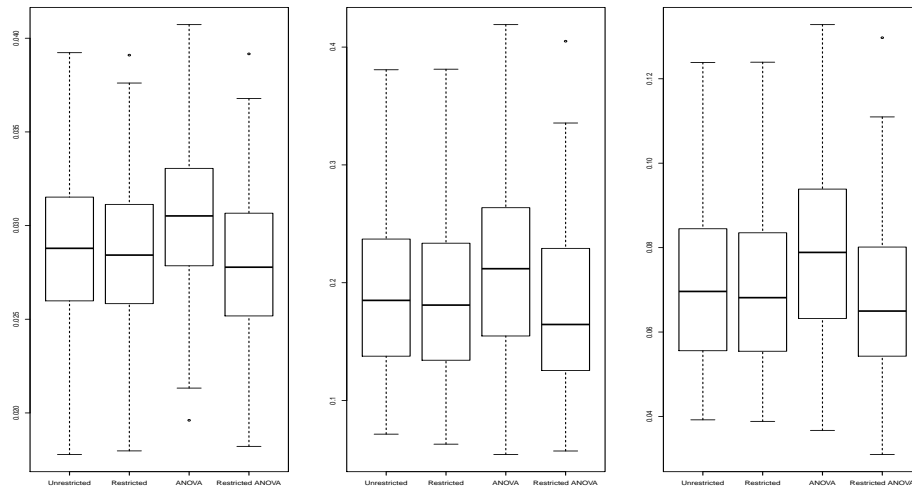

**Figure S5.** MAE in the fit (left panel), in the forecast (middle panel), and in total (right panel) of smooth models in scenario 1 and  $n_{z_p} = 10, n_{x_p} = 10$ .

- $n_{z_p} = 10, n_{x_p} = 15$

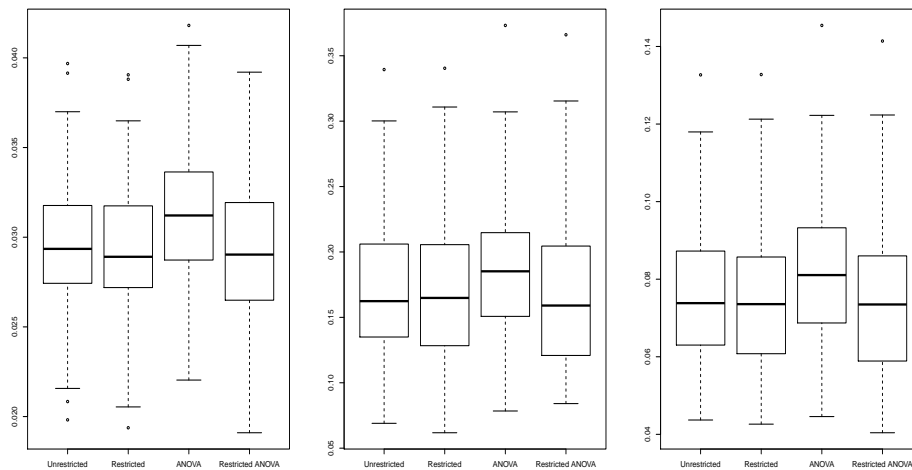

**Figure S6.** MAE in the fit (left panel), in the forecast (middle panel) and in total (right panel) of smooth models in scenario 1 and  $n_{z_p} = 10, n_{x_p} = 15$ .

- $n_{z_p} = 10, n_{x_p} = 20$



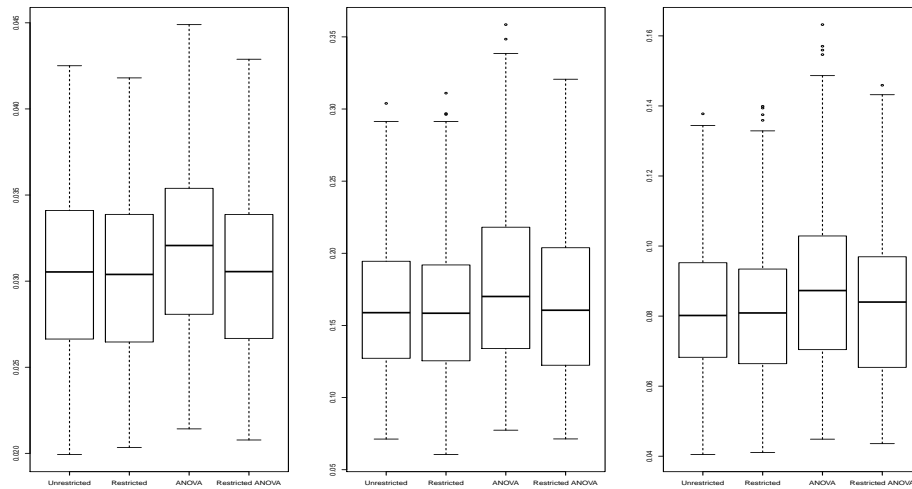

**Figure S7.** MAE in the fit (left panel), in the forecast (middle panel) and in total (right panel) of smooth models in [scenario 1](#) and  $n_{z_p} = 10, n_{x_p} = 30$ .

- $n_{z_p} = 20, n_{x_p} = 5$

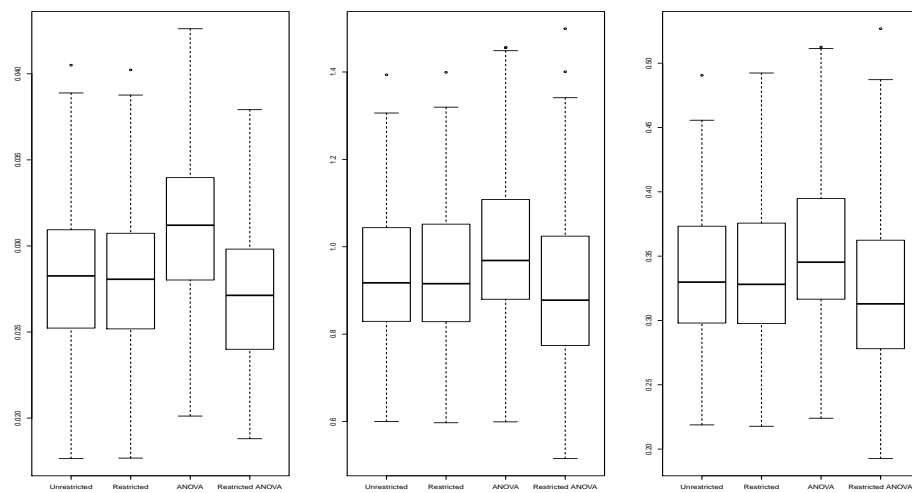

**Figure S8.** MAE in the fit (left panel), in the forecast (middle panel) and in total (right panel) of smooth models in [scenario 1](#) and  $n_{z_p} = 20, n_{x_p} = 5$ .

- $n_{z_p} = 20, n_{x_p} = 10$

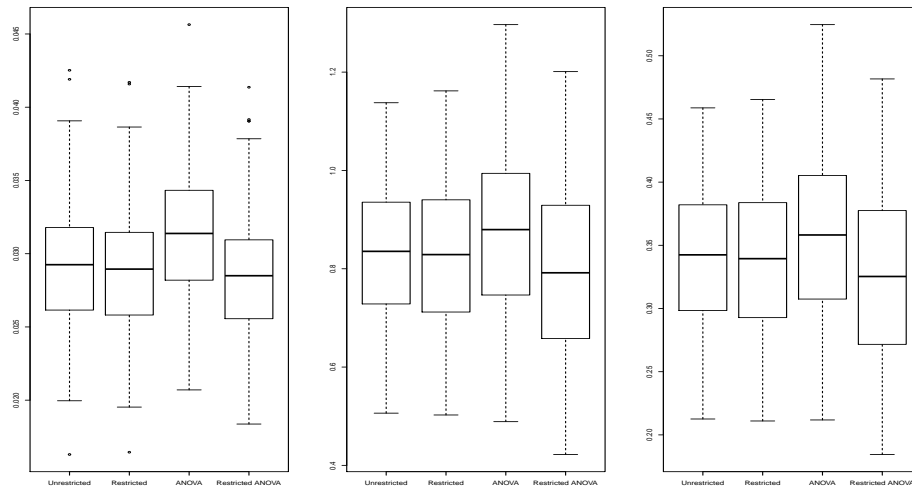

**Figure S9.** MAE in the fit (left panel), in the forecast (middle panel) and in total (right panel) of smooth models in [scenario 1](#) and  $n_{z_p} = 20, n_{x_p} = 10$ .

- $n_{z_p} = 20, n_{x_p} = 15$

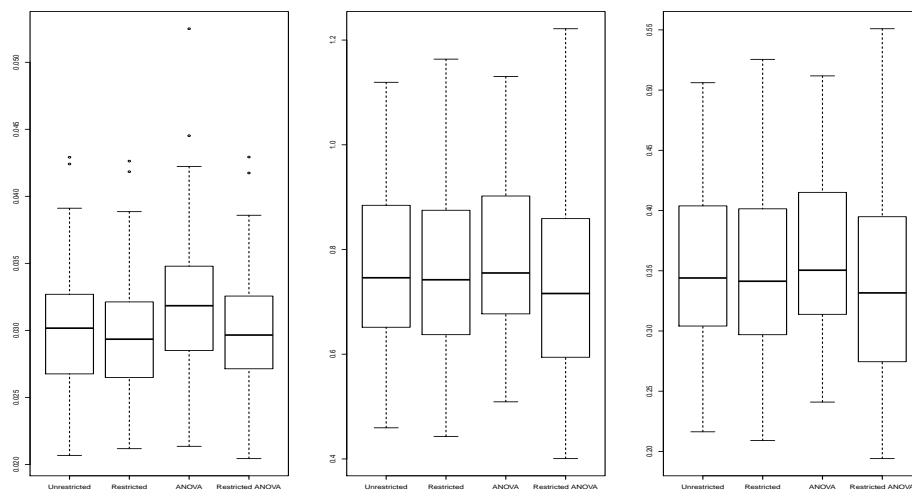

**Figure S10.** MAE in the fit (left panel), in the forecast (middle panel) and in total (right panel) of smooth models in [scenario 1](#) and  $n_{z_p} = 20, n_{x_p} = 15$ .

- $n_{z_p} = 20, n_{x_p} = 20$

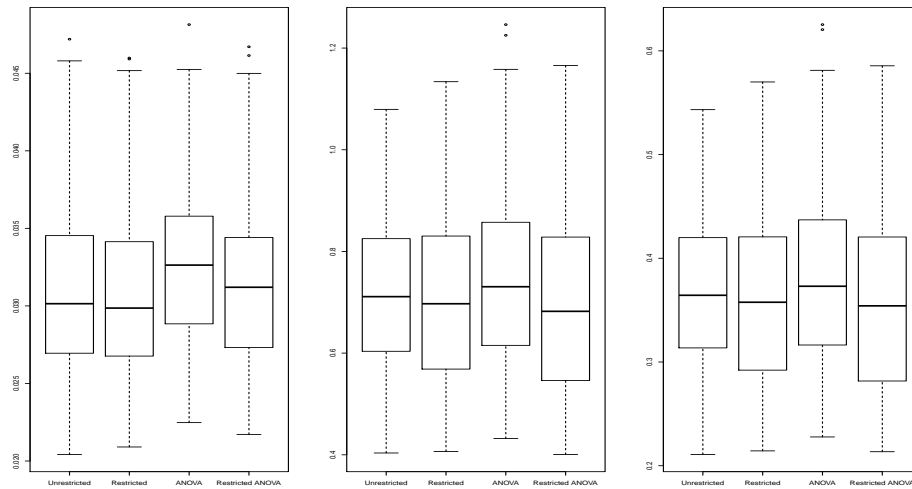

**Figure S11.** MAE in the fit (left panel), in the forecast (middle panel) and in total (right panel) of smooth models in [scenario 1](#) and  $n_{z_p} = 20, n_{x_p} = 20$ .

### Simulation results for Scenario 2

- $n_{z_p} = 0, n_{x_p} = 10$

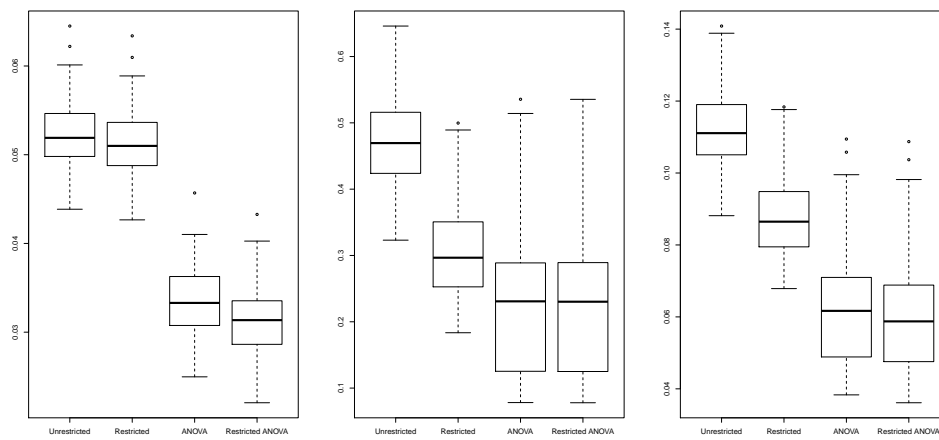

**Figure S12.** MAE in the fit (left panel), in the forecast (middle panel) and in total (right panel) of smooth models in [scenario 2](#) and  $n_{z_p} = 0$  and  $n_{x_p} = 10$ .

- $n_{z_p} = 0, n_{x_p} = 15$

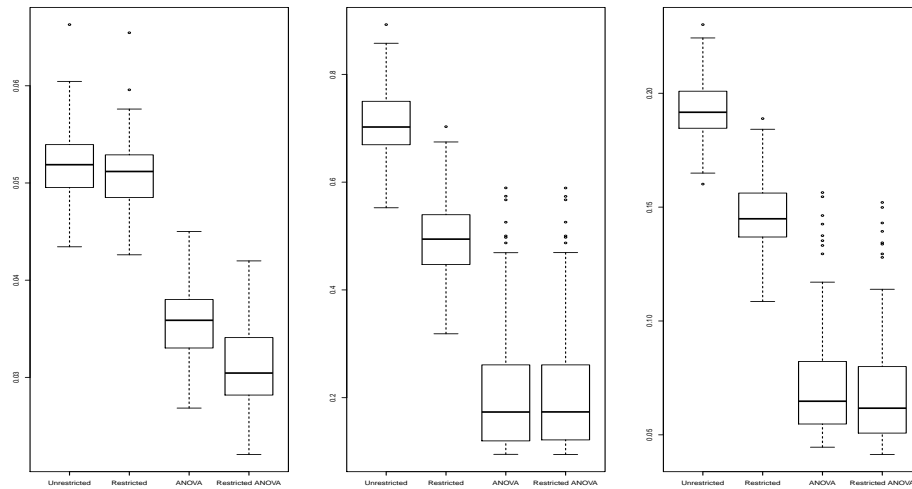

**Figure S13.** MAE in the fit (left panel), in the forecast (middle panel) and in total (right panel) of smooth models in scenario 2 and  $n_{z_p} = 0$  and  $n_{x_p} = 15$ .

- $n_{z_p} = 0, n_{x_p} = 20$

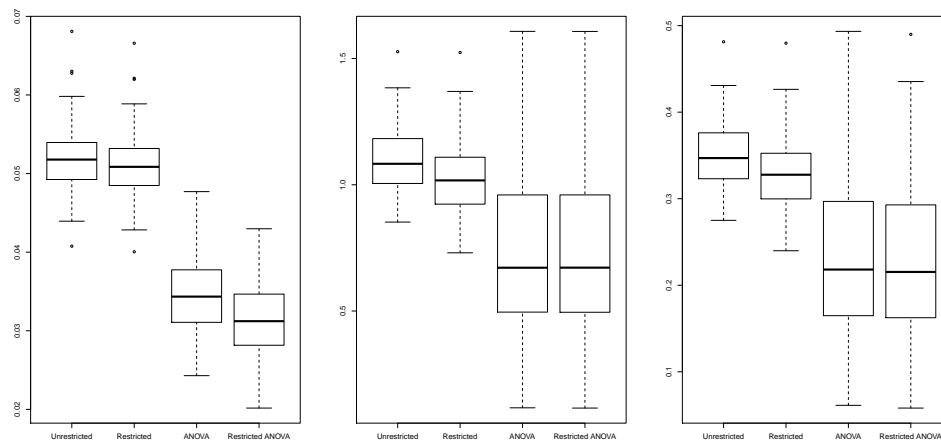

**Figure S14.** MAE in the fit (left panel), in the forecast (middle panel) and in total (right panel) of smooth models in scenario 2 and  $n_{z_p} = 0$  and  $n_{x_p} = 20$ .

- $n_{z_p} = 10, n_{x_p} = 5$

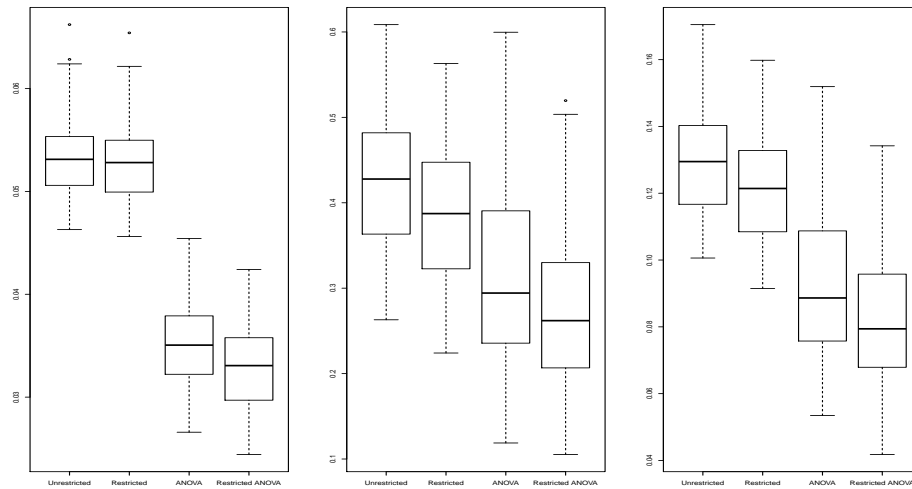

**Figure S15.** MAE in the fit (left panel), in the forecast (middle panel) and in total (right panel) of smooth models in scenario 2 and  $n_{z_p} = 10$  and  $n_{x_p} = 5$ .

- $n_{z_p} = n_{x_p} = 10$

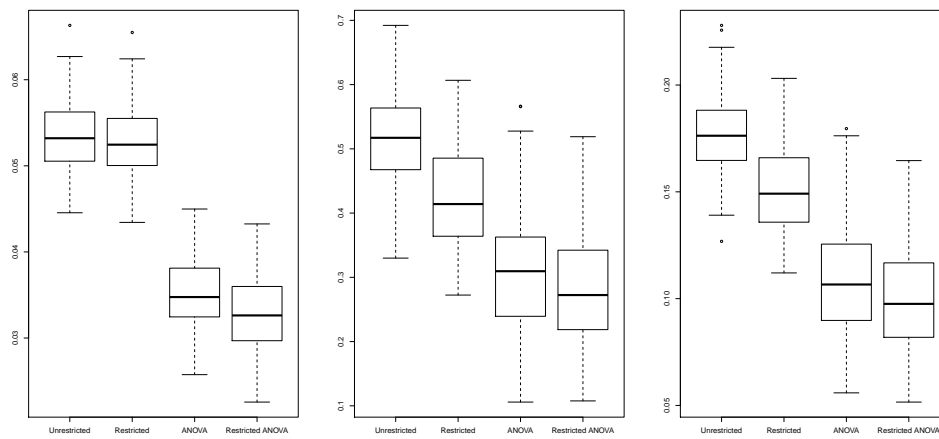

**Figure S16.** MAE in the fit (left panel), in the forecast (middle panel) and in total (right panel) of smooth models in scenario 2 and  $n_{z_p} = n_{x_p} = 10$ .

- $n_{z_p} = 10, n_{x_p} = 15$

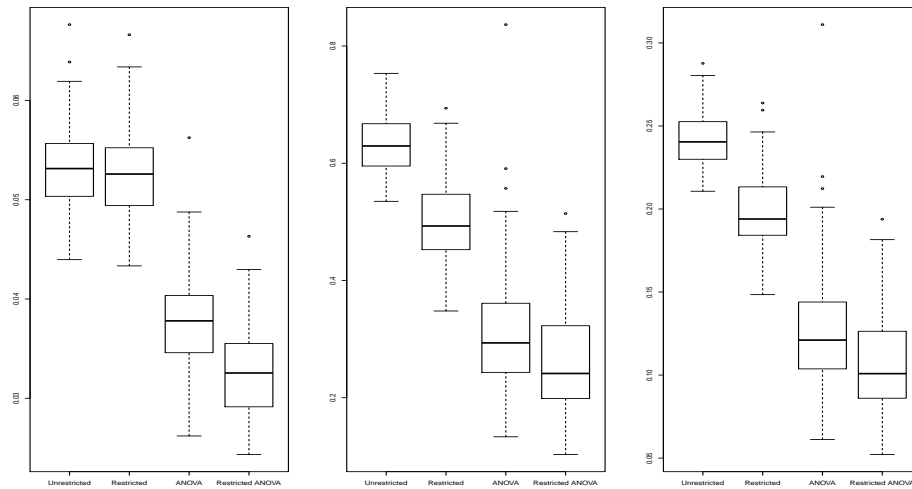

**Figure S17.** MAE in the fit (left panel), in the forecast (middle panel) and in total (right panel) of smooth models in scenario 2 and  $n_{z_p} = 10$  and  $n_{x_p} = 15$ .

- $n_{z_p} = 10, n_{x_p} = 20$



**Figure S18.** MAE in the fit (left panel), in the forecast (middle panel) and in total (right panel) of smooth models in scenario 2 and  $n_{z_p} = 20$  and  $n_{x_p} = 5$ .

- $n_{z_p} = 20, n_{x_p} = 5$

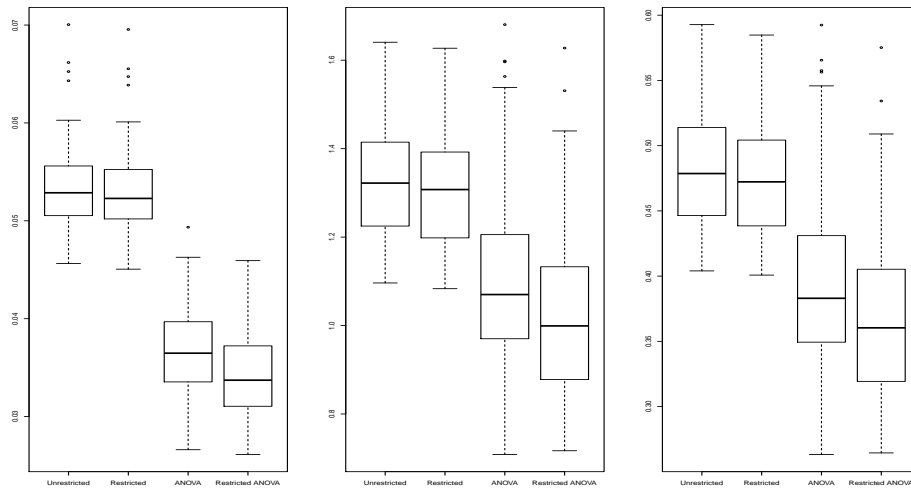

**Figure S19.** MAE in the fit (left panel), in the forecast (middle panel) and in total (right panel) of smooth models in scenario 2 and  $n_{z_p} = 20$  and  $n_{x_p} = 5$ .

- $n_{z_p} = 20, n_{x_p} = 10$

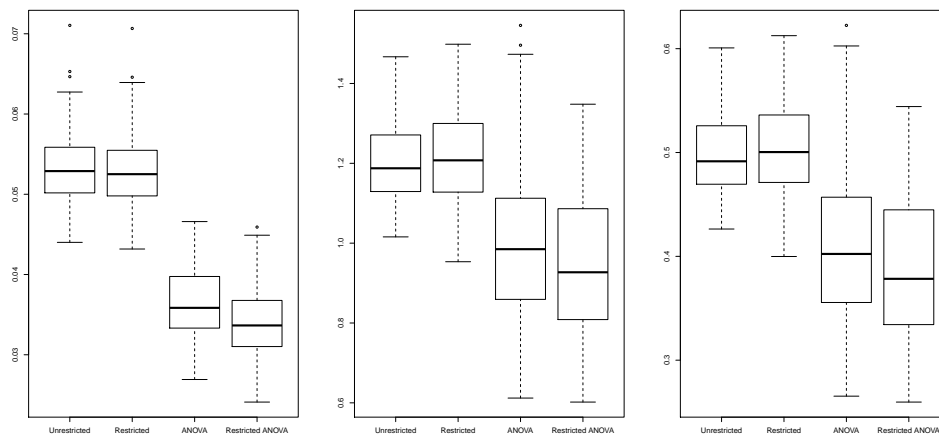

**Figure S20.** MAE in the fit (left panel), in the forecast (middle panel) and in total (right panel) of smooth models in scenario 2 and  $n_{z_p} = 20$  and  $n_{x_p} = 10$ .

- $n_{z_p} = 20, n_{x_p} = 15$

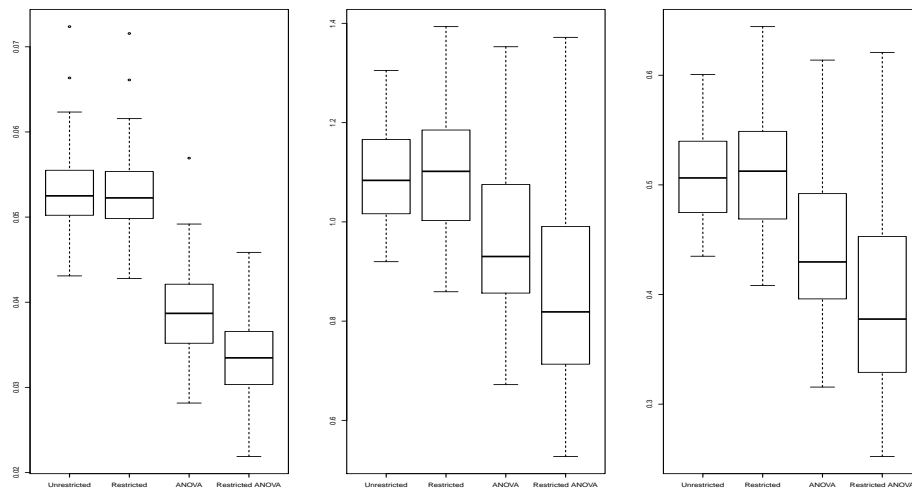

**Figure S21.** MAE in the fit (left panel), in the forecast (middle panel) and in total (right panel) of smooth models in scenario 2 and  $n_{z_p} = 20$  and  $n_{x_p} = 15$ .

- $n_{z_p} = n_{x_p} = 20$

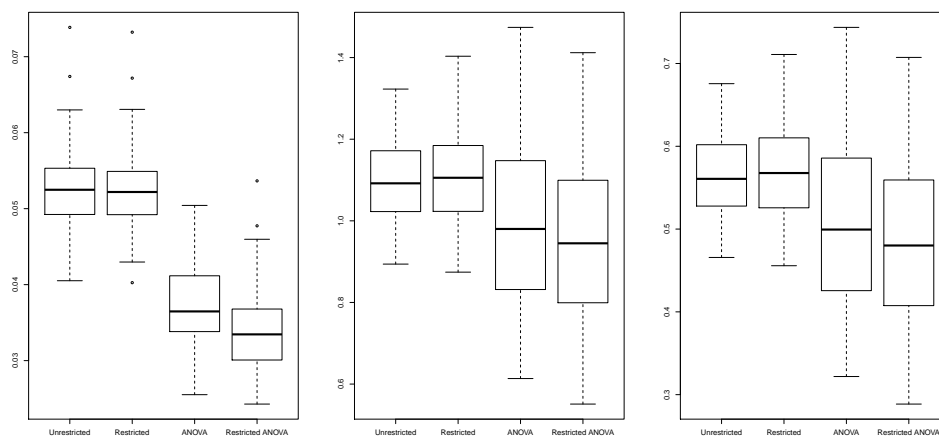

**Figure S22.** MAE in the fit (left panel), in the forecast (middle panel) and in total (right panel) of smooth models in scenario 2 and  $n_{z_p} = n_{x_p} = 20$ .

## References

1. Harville, D. *Matrix Algebra from a Statistician's Perspective*; Springer, 2000.
